# Supplementary material for: Phosphorylated Cotton Cellulose as a Matrix for Generating Chlorine Dioxide
Source: MDPI journal article supplement (doi:10.3390/polym15040967), 2023-02-15
Supplement: s1 [file s1]

# Phosphorylated cotton cellulose as a matrix for generating chlorine dioxide

Anfisa Kazberova\*, Roman Solovov, and Verbina Orlichenia

<sup>1</sup> Frumkin Institute of Physical Chemistry and Electrochemistry of the Russian Academy of Sciences, 40 Obruchev Street, Moscow, 117342 Russia; roman\_solovov@mail.ru (R.S.); kazberova.a.y@mail.ru (A.K.); verbinao@mail.ru (V.O.)

\* Correspondence: kazberova.a.y@mail.ru

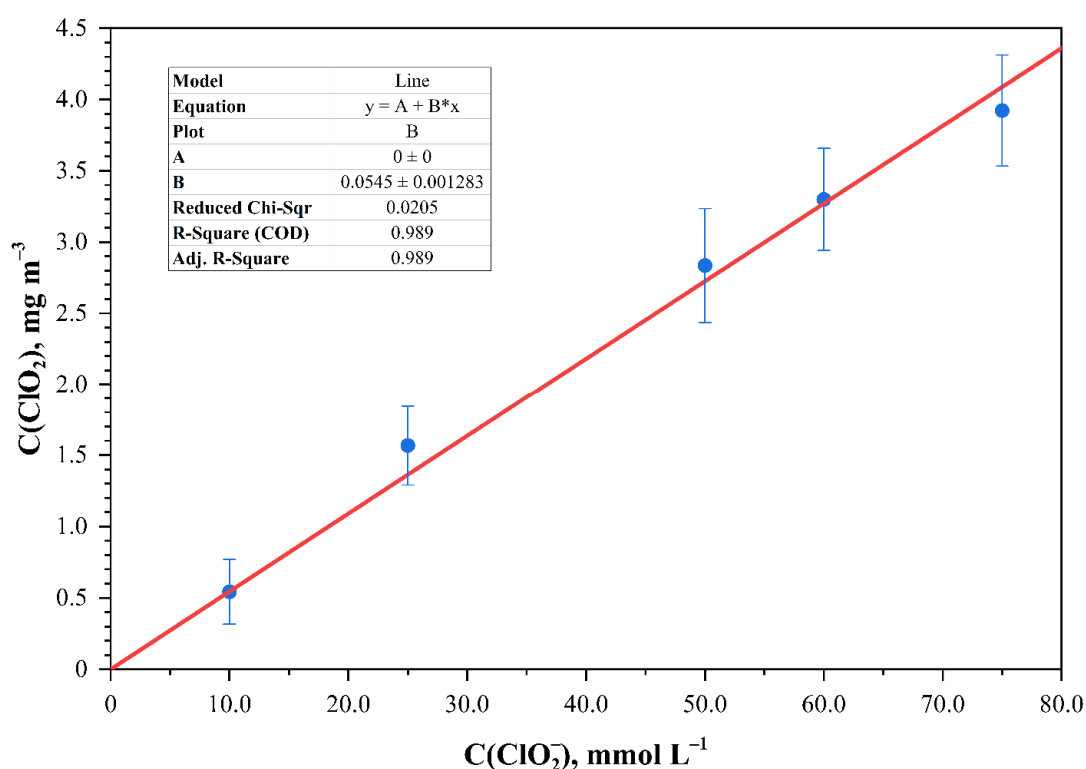

**Figure S1.** The dependence of the  $\text{ClO}_2$  concentration formed in the air on the initial concentration of  $\text{NaClO}_2$  in an alcohol solution, with which phosphorylated cellulose is treated.
