# Supplementary material
Source: MDPI journal article supplement (https://www.mdpi.com/2073-4360/15/4/967)
Supplement: s1 [file s1]

Archive with 1 entries (1 files):
- polymers-2100213-supplementary-final.pdf
